# Supplementary material
Source: PubMed Central journal article supplement (PMC10695251)

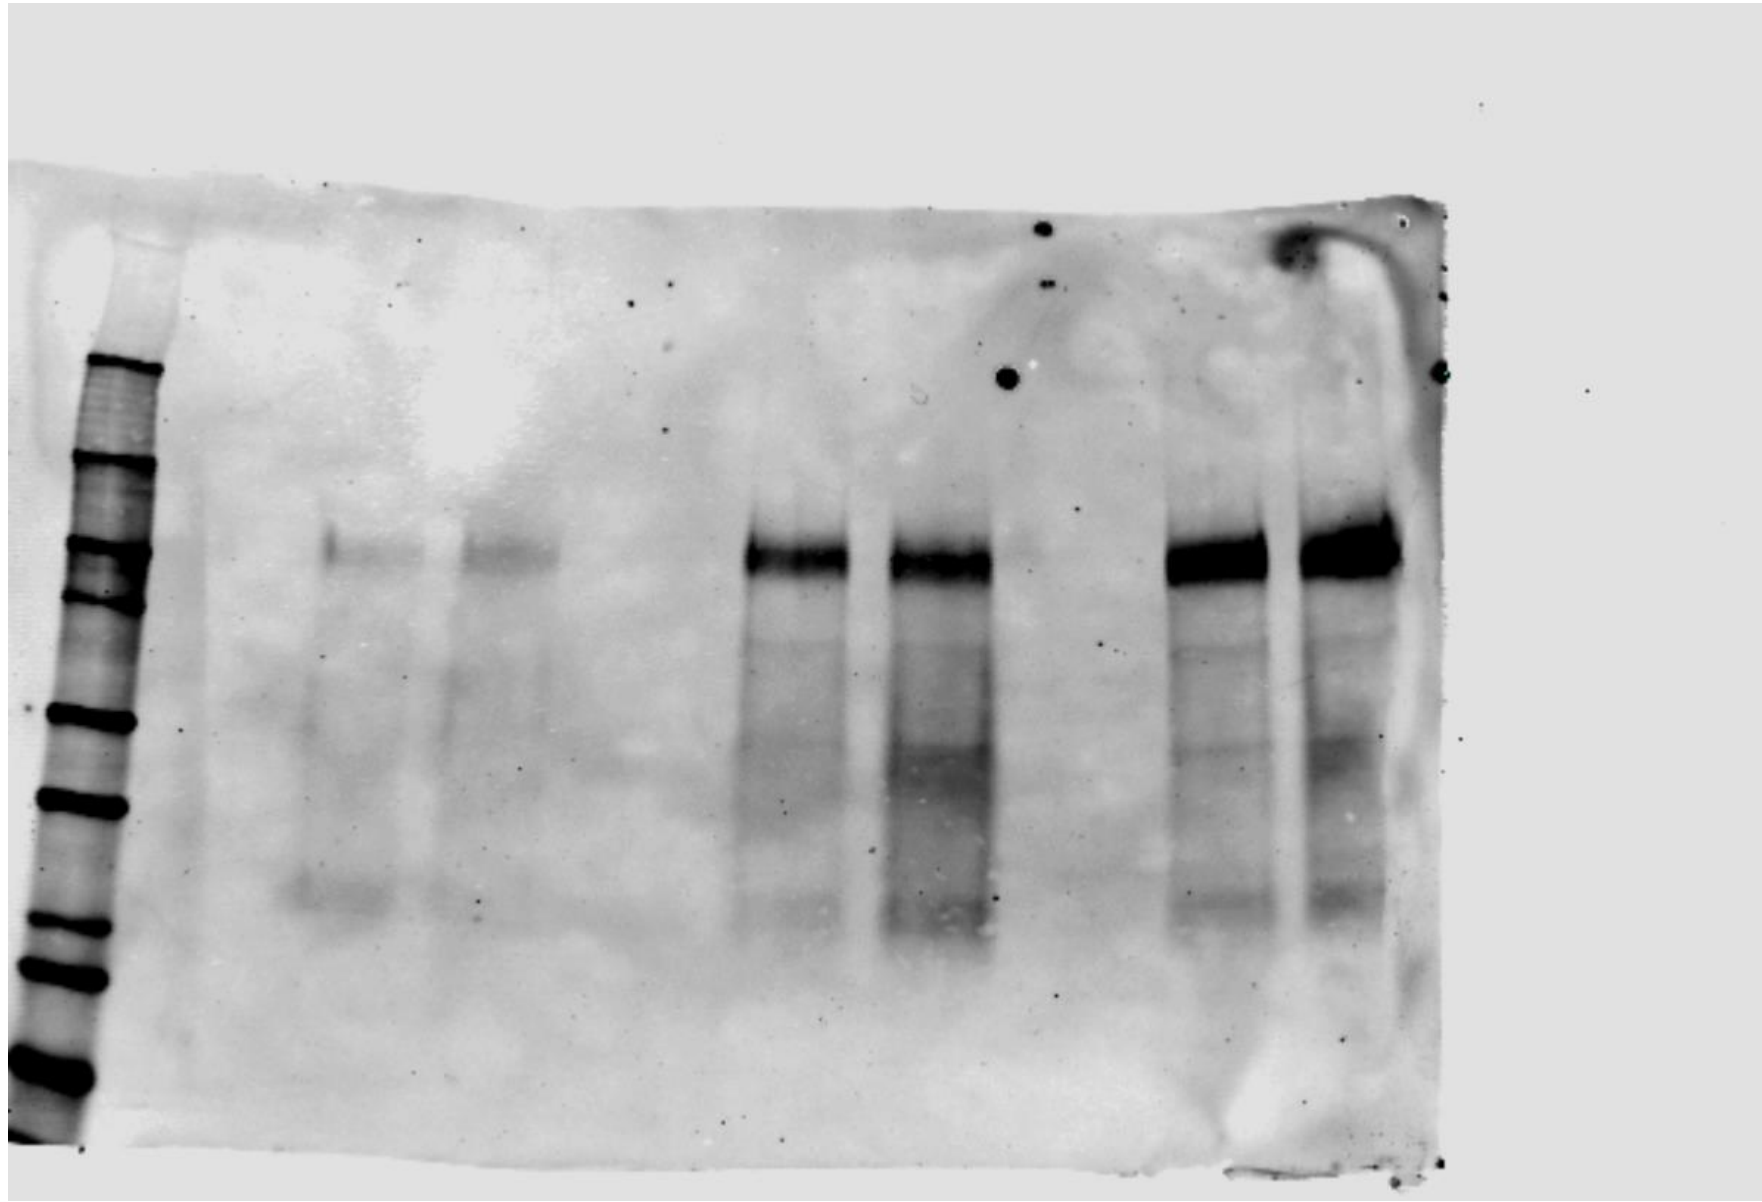

Supplement: media-1.pdf [file media-1.pdf]
